# Supplementary material for: Multi-responsive, injectable, and self-healing hydrogels based on benzoxaborole–tannic acid complexation
Source: Royal Society of Chemistry journal article supplement (doi:10.1039/d1py00692d), 2021-01-01
Supplement: d1py00692d2.pdf [file d1py00692d2.pdf]

## Supplementary Information

### Multi-responsive, Injectable, and Self-Healing Hydrogel based on Benzoxaborole-Tannic Acid Complexation

Yi-Yang Peng<sup>a,Ω</sup>, Qiu Li Cheng<sup>b,Ω</sup>, Wenda Wang<sup>a</sup>, Meng Wu<sup>a</sup>, Diana Diaz-Dussan<sup>a</sup>, Piyush Kumar<sup>c</sup>, and Ravin Narain<sup>a,\*</sup>

<sup>a</sup>Department of Chemical and Material Engineering, University of Alberta, Edmonton, Alberta T6G 1H9, Canada

<sup>b</sup>State Key Laboratory of Supramolecular Structure and Materials, College of Chemistry, Jilin University, Changchun 130012, P. R. China

<sup>c</sup>Department of Oncology, University of Alberta, Cross Cancer Institute, Edmonton, T6G 1Z2, Alberta, Canada

\*Corresponding author, Email: [narain@ualberta.ca](mailto:narain@ualberta.ca)

**Table S1.** Composition and molecular weight of PMM that determined by analyzing the <sup>1</sup>H NMR spectrum and GPC.

| Polymer | Composition (mol%) |       | Molecular Weight |                   |
|---------|--------------------|-------|------------------|-------------------|
|         | MPC                | MAABO | $M_n$ (kDa)      | PDI ( $M_w/M_n$ ) |
| PMM     | 95.9               | 4.1   | 63.8             | 4.685             |

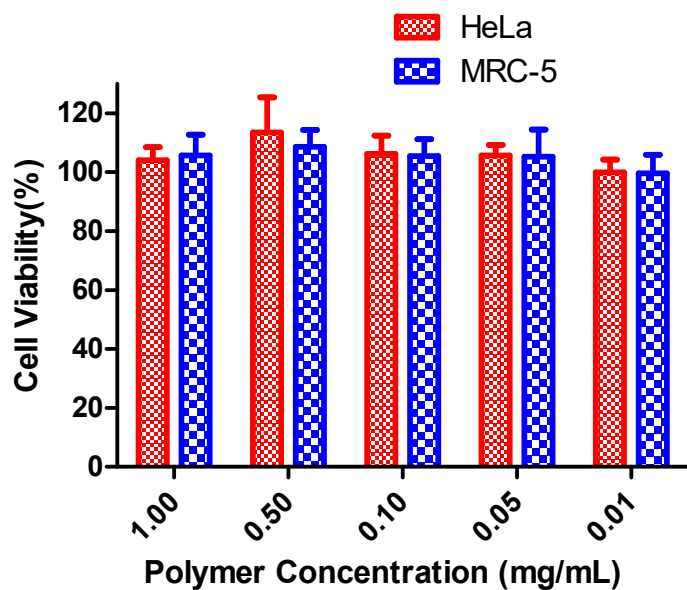

**Fig. S1.** Cytotoxicity of various concentrations of poly(MPC-*st*-MAABO) with HeLa cells after 24 hours of incubation. MTT assay was used to determine cell viability.

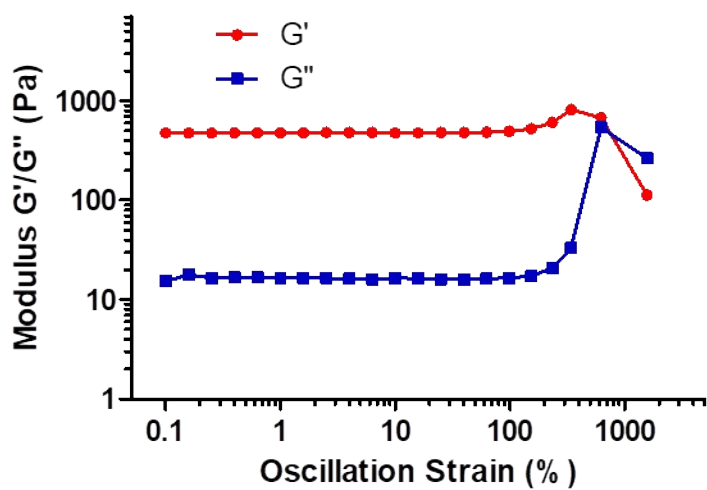

**Fig. S2.** Strain sweep of hydrogel (MT3) at a constant frequency of 1Hz.

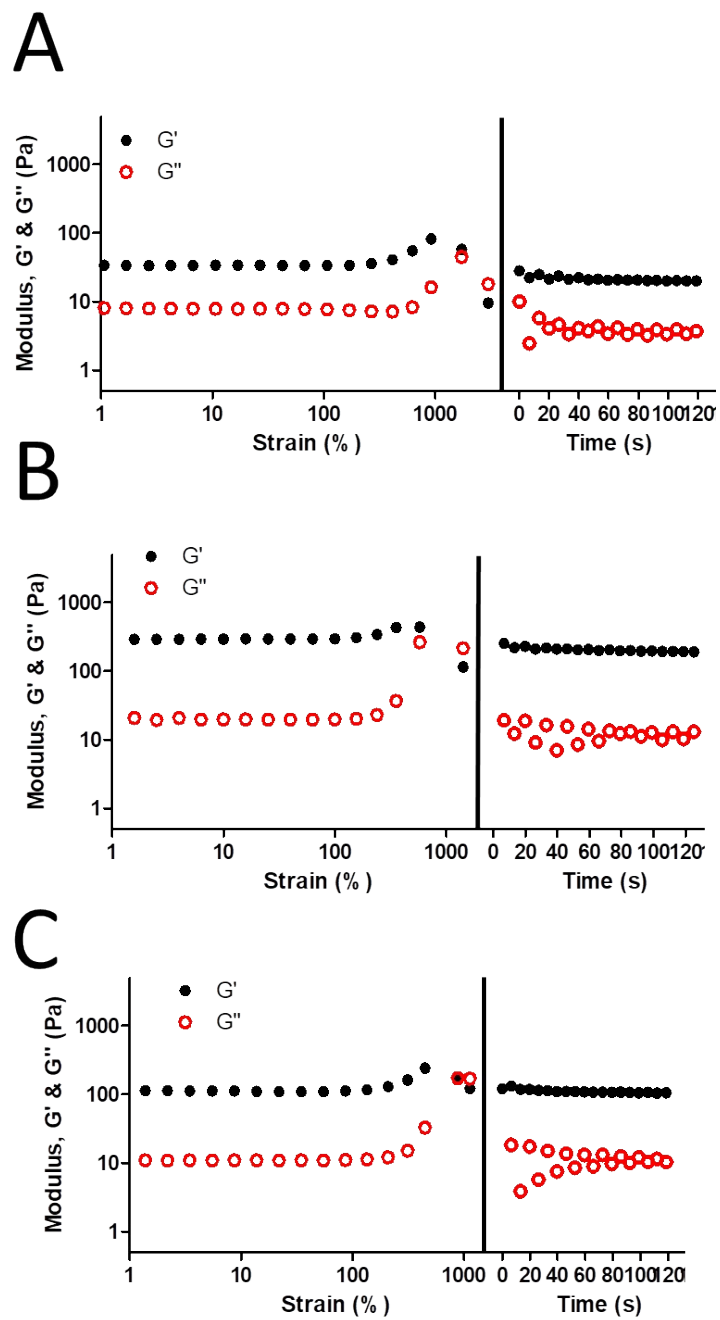

**Fig. S3.** Strain sweep (left) and subsequently conducted time sweep measurement (right) with strain at 1% with MT 4.5 (A), MT 3.75 (B), and MT 3.0 (C).
